# Supplementary material for: Purification of amoxicillin trihydrate in the presence of degradation products by different washing methods
Source: Royal Society of Chemistry journal article supplement (doi:10.1039/d1ce01073e), 2021-01-01
Supplement: d1ce01073e1.pdf [file d1ce01073e1.pdf]

## Supplementary files

### Purification of Amoxicillin Trihydrate in the Presence of Degradation Products by Washing Method

M.F.Ergin

Calibration curve for Amct and 4-HPG

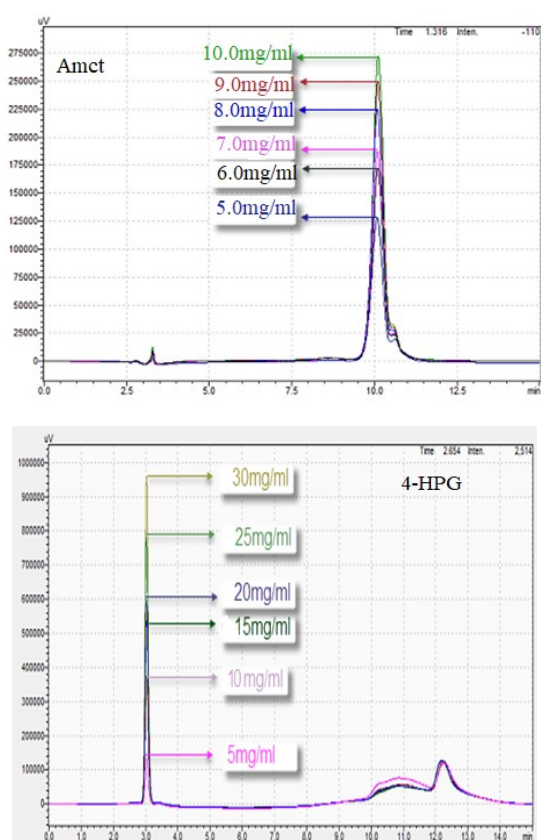

Figure 1 The calibration curve for Amct and 4-HPG.
